# Supplementary material
Source: Springer Nature journal article supplement (https://www.springermedizin.de/resource/supplementary/13023_2012_522_MOESM5_ESM.pdf/9642318)

**A Survival**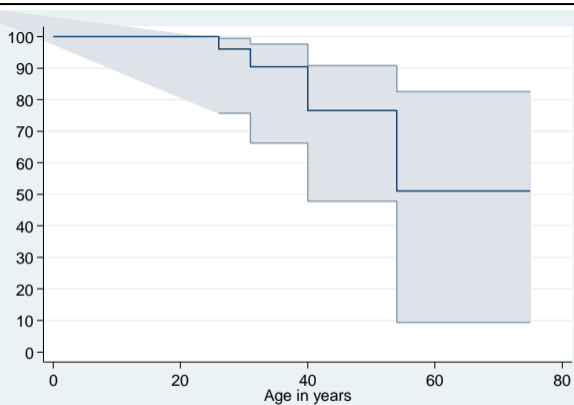

95% CI Survivor function

**B Risk of cancer**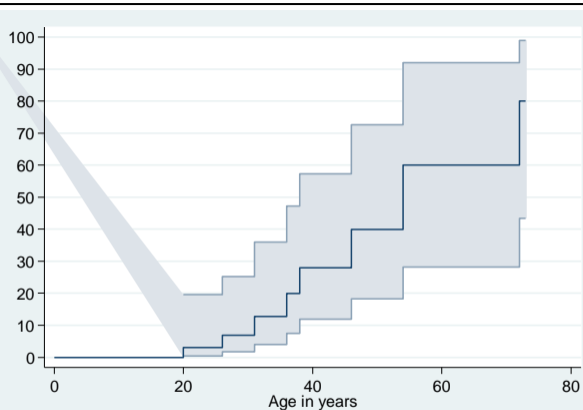

95% CI Risk of cancer

Supplement: MOESM5 [file 9642318]
